# Supplementary material for: Ultralow Ru-incorporated MoS2 nanosheet arrays for efficient electrocatalytic hydrogen evolution in dual-pH
Source: Royal Society of Chemistry journal article supplement (doi:10.1039/d1nj05434a), 2021-12-21
Supplement: d1nj05434a1.pdf [file d1nj05434a1.pdf]

**Ultralow Ru incorporated MoS<sub>2</sub> nanosheet arrays for efficient  
electrocatalytic hydrogen evolution in dual-pH**

Hao Cui <sup>a#</sup>, Rui Dong <sup>a#</sup>, Jinchan Zhao <sup>a</sup>, Pengfei Tan <sup>a\*</sup>, Jianping Xie <sup>b\*</sup> and Jun Pan <sup>a\*</sup>

<sup>a</sup> State Key Laboratory for Powder Metallurgy, Central South University, Changsha 410083, P. R. China.

<sup>b</sup> School of Minerals Processing and Bioengineering, Central South University, Changsha 410083, P. R. China

<sup>#</sup> The authors contribute equally to this work.

<sup>\*</sup> Corresponding author

To whom correspondence should be addressed: [jun.pan@csu.edu.cn](mailto:jun.pan@csu.edu.cn);

[tpf0203@csu.edu.cn](mailto:tpf0203@csu.edu.cn)

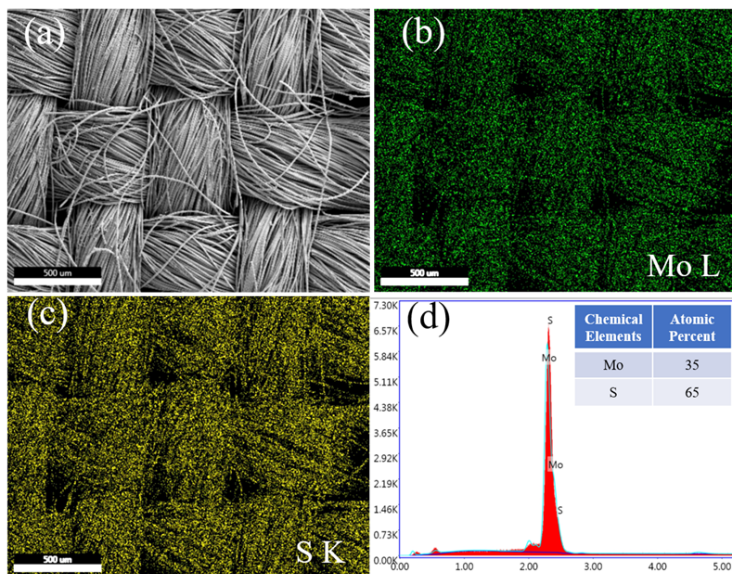

Figure S1 EDS spectrum of MoS<sub>2</sub>/CC.

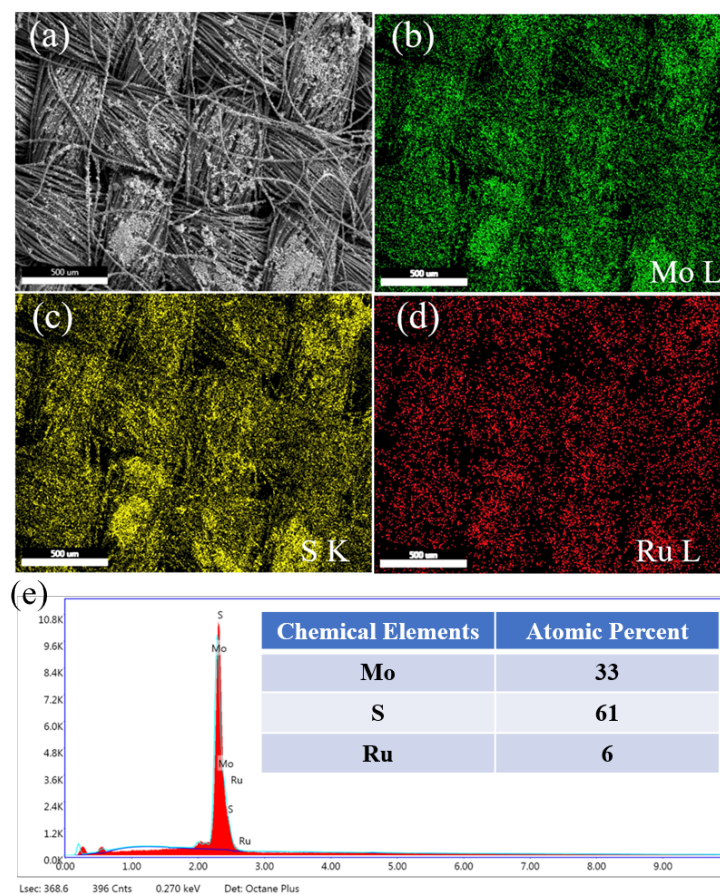

Figure S2 EDS spectrum of 0.005-MoS<sub>2</sub>/CC.

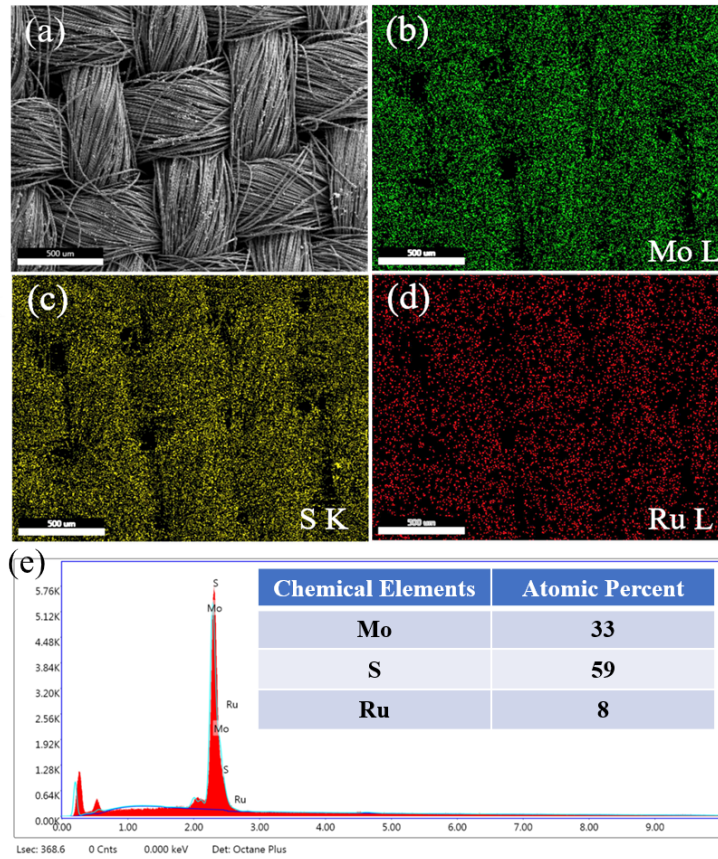

Figure S3 EDS spectrum of 0.01-MoS<sub>2</sub>/CC.

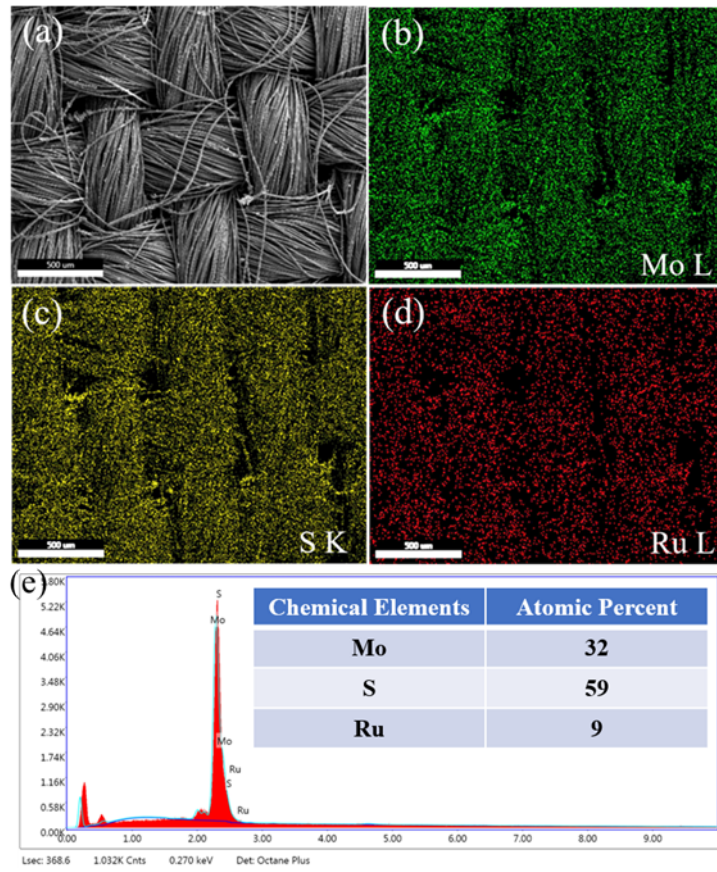

Figure S4 EDS spectrum of 0.015-MoS<sub>2</sub>/CC.

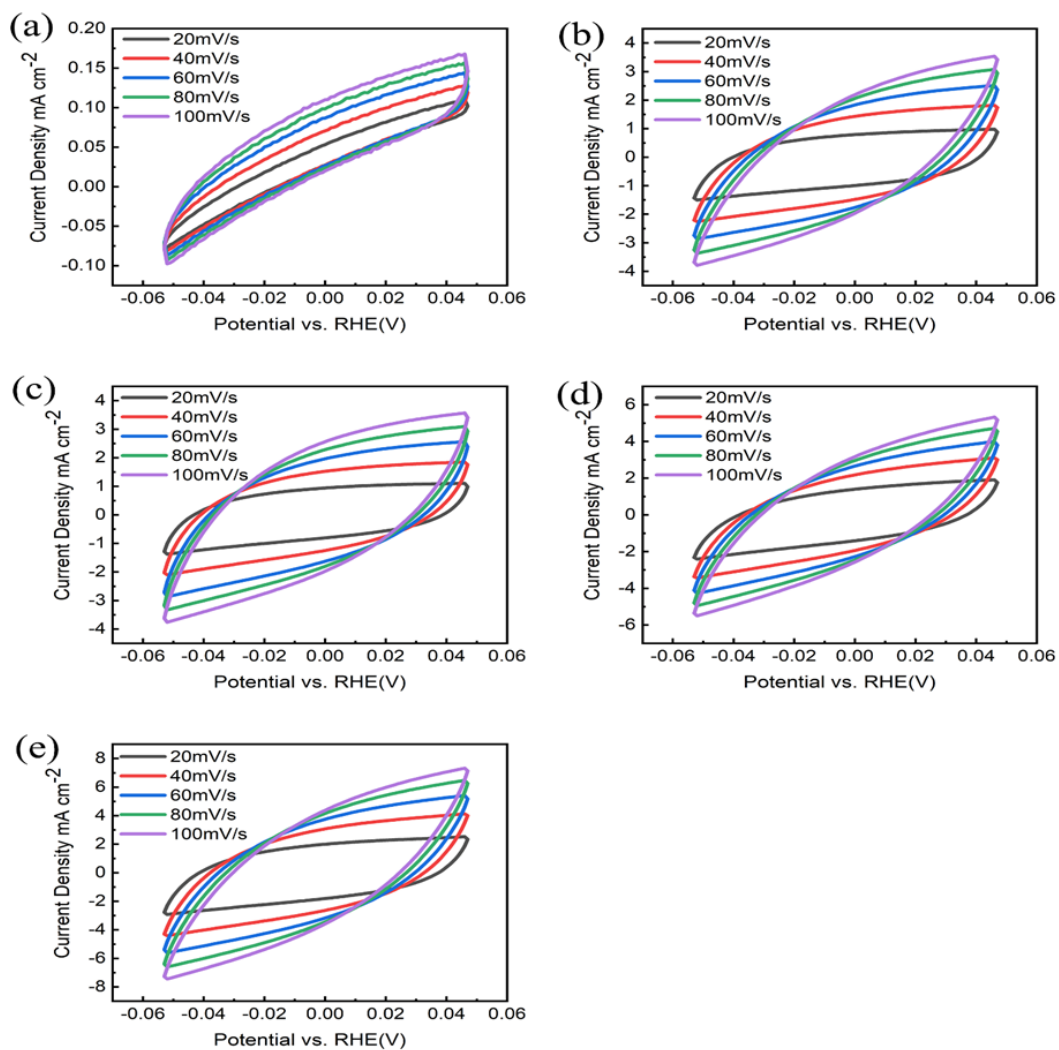

Figure S5. CV curves for (a) CC, (a)  $\text{MoS}_2/\text{CC}$ , (b)  $0.005\text{-Ru-MoS}_2/\text{CC}$ , (c)  $0.01\text{-Ru-MoS}_2/\text{CC}$  and (d)  $0.015\text{-Ru-MoS}_2/\text{CC}$  at different scan rates with 20, 40, 60, 80, and 100  $\text{mV s}^{-1}$  in 0.5 M  $\text{H}_2\text{SO}_4$ .

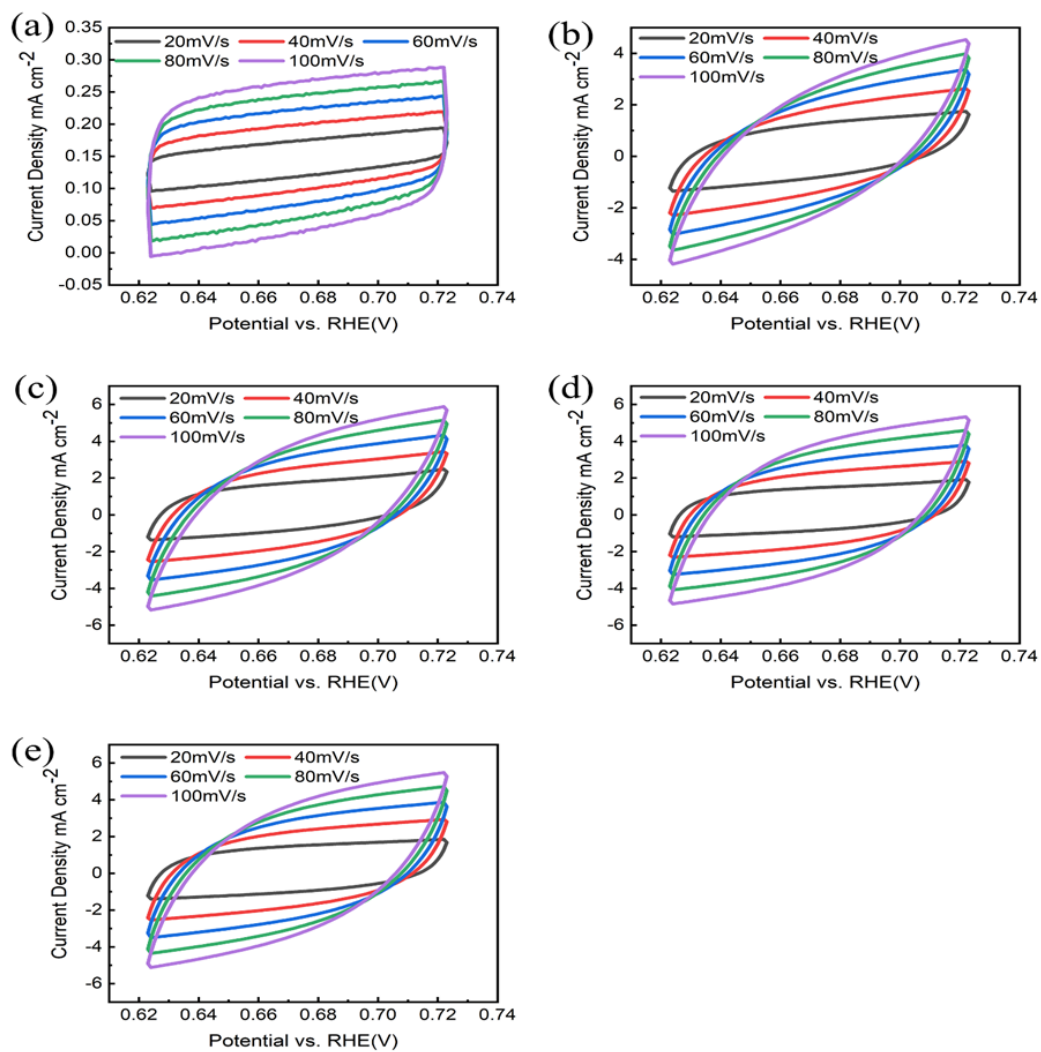

Figure S6. CV curves for (a) CC, (a) MoS<sub>2</sub>/CC, (b) 0.005-Ru-MoS<sub>2</sub>/CC, (c) 0.01-Ru-MoS<sub>2</sub>/CC and (d) 0.015-Ru-MoS<sub>2</sub>/CC at different scan rates with 20, 40, 60, 80, and 100 mV s<sup>-1</sup> in 1 M KOH.

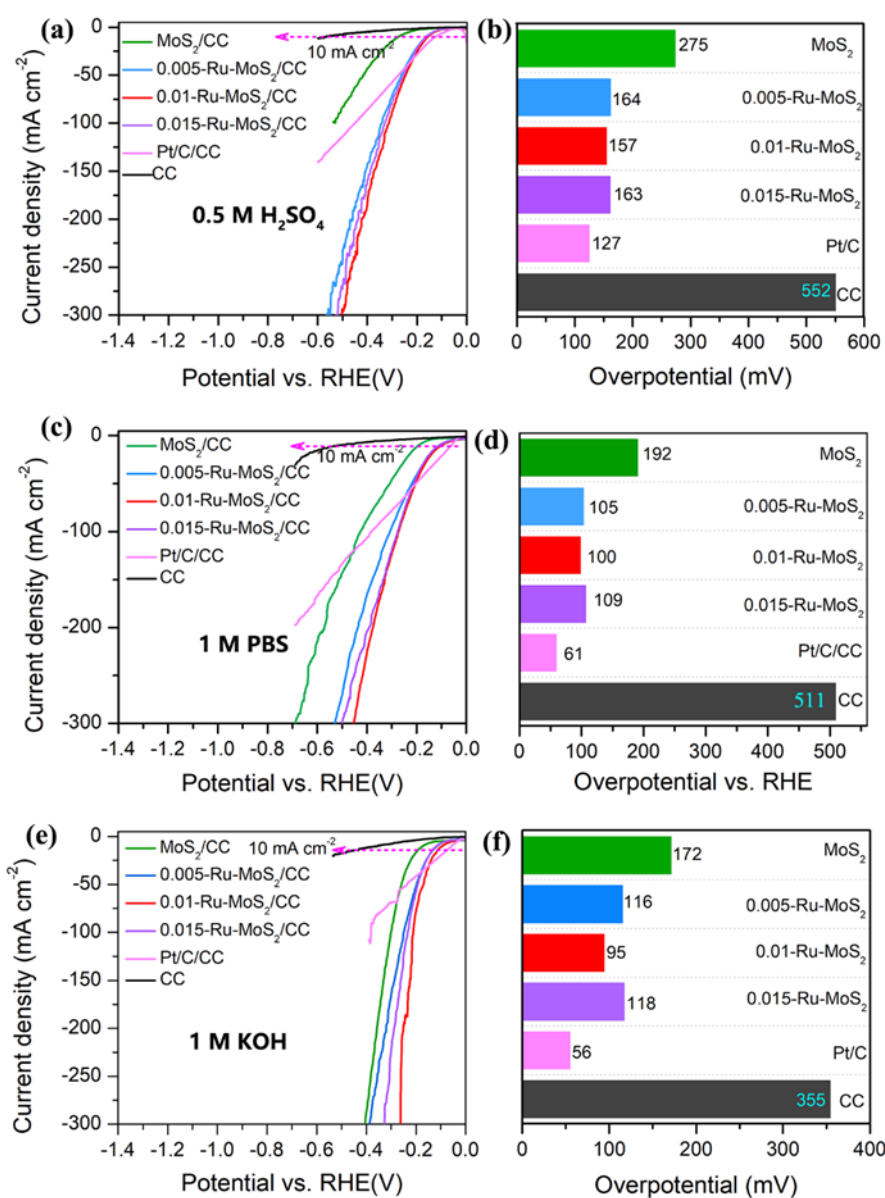

Figure S7. Polarization curves of all synthesized catalysts with carbon plate as the counter electrode

(a, b) 0.5 M H<sub>2</sub>SO<sub>4</sub>, (b, c) 1M PBS and (e, f) 1M KOH.

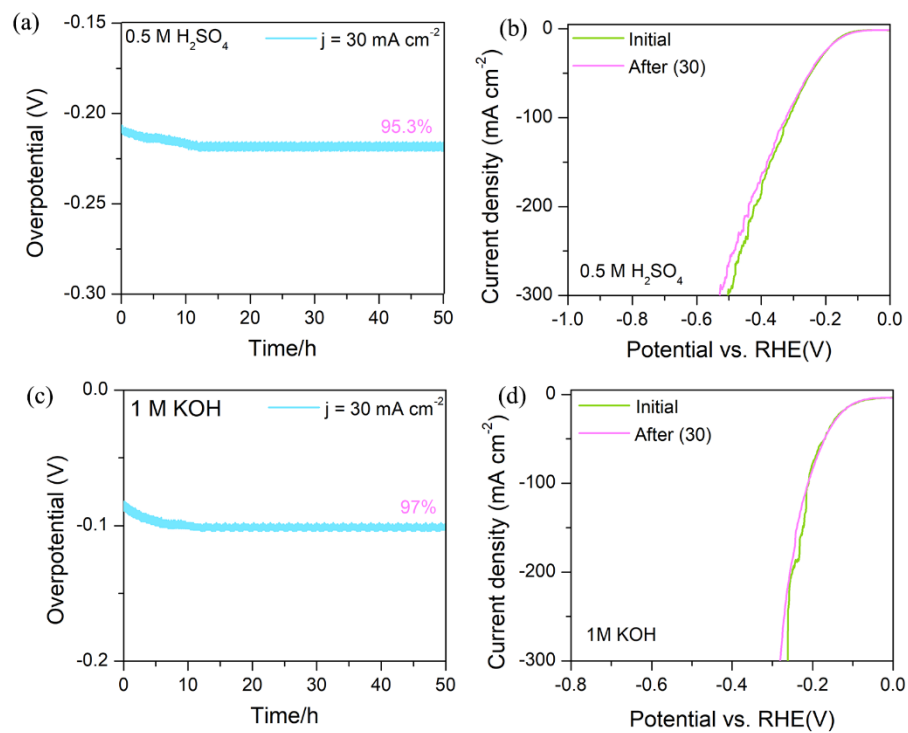

Figure S8. Stability curves and polarization curves of 0.01-Ru MoS<sub>2</sub>/CC at 30 mA cm<sup>-2</sup> for 50 h in

(a, b) 0.5 M H<sub>2</sub>SO<sub>4</sub> and (c, d) 1.0 M KOH with carbon plate as the counter electrode.

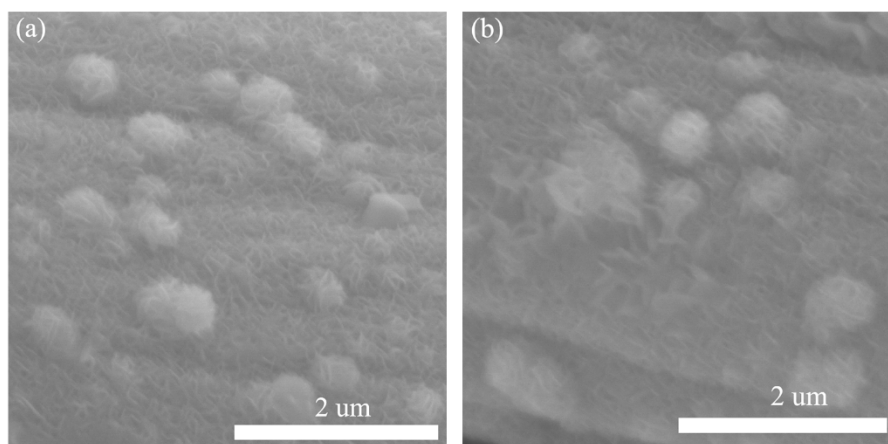

Figure S9. SEM images of 0.01-Ru MoS<sub>2</sub>/CC after HER stability test at 30 mA cm<sup>-2</sup> for 50 h in (a)

0.5 M H<sub>2</sub>SO<sub>4</sub> and (b) 1 M KOH solution, respectively.
